# Supplementary figures and images for: Deep Eutectic Solvents as New Extraction Media for Flavonoids in Mung Bean
Source: MDPI journal article supplement (doi:10.3390/foods13050777), 2024-03-01

## Supplementary Figure S1

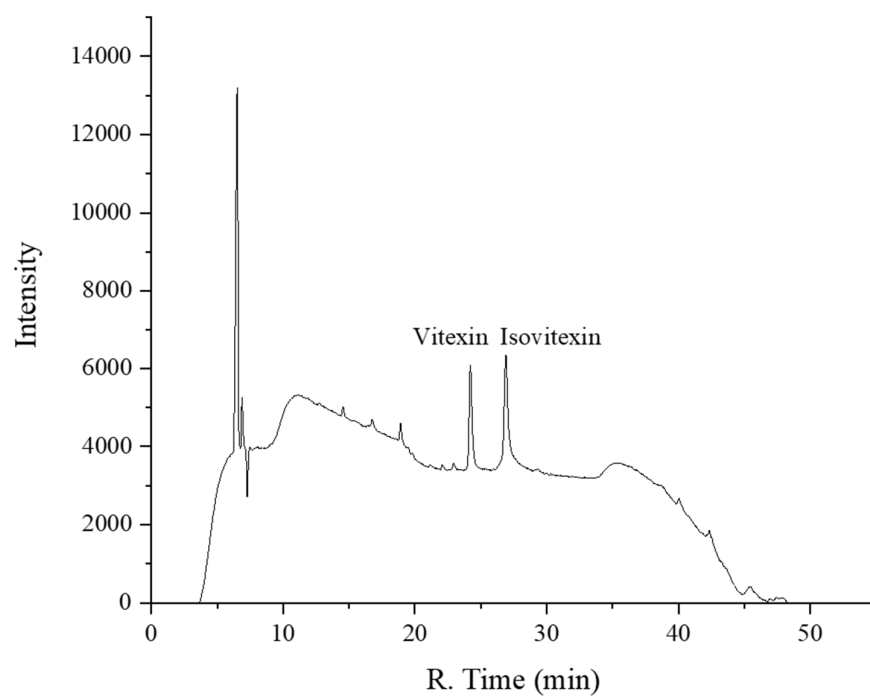

**Figure S1.** The chromatogram of mung bean flavonoids.

Supplement: s1 [file s1]
